# Supplementary material for: Mechanism Profiling of Hepatotoxicity Caused by Oxidative Stress Using Antioxidant Response Element Reporter Gene Assay Models and Big Data
Source: PubMed Central journal article supplement (PMC4858396; doi:10.1289/ehp.1509763), 2015-09-18
Supplement: ehp.1509763.s001.acco.pdf [file ehp.1509763.s001.acco.pdf]

**Note to Readers:** *EHP* strives to ensure that all journal content is accessible to all readers. However, some figures and Supplemental Material published in *EHP* articles may not conform to 508 standards due to the complexity of the information being presented. If you need assistance accessing journal content, please contact [ehp508@niehs.nih.gov](mailto:ehp508@niehs.nih.gov). Our staff will work with you to assess and meet your accessibility needs within 3 working days.

## **Supplemental Material**

# **Mechanism Profiling of Hepatotoxicity Caused by Oxidative Stress Using the Antioxidant Response Element Reporter Gene Assay Models and Big Data**

Marlene Thai Kim, Ruili Huang, Alexander Sedykh, Wenyi Wang, Menghang Xia, and Hao Zhu

### **Table of Contents**

**Table S1.** Final 20 PubChem assays manually evaluated for consideration into the final biological response profile

**Figure S1.** Performance of all individual models and the consensus model in the 5-fold cross validation

**Table S1.** Final 20 PubChem assays manually evaluated for consideration into the final biological response profile

| AID  | Statistics for relationship to liver damage <sup>a</sup> |    |    |     |      |      |                  |                | Statistics for relationship to ARE- <i>bla</i> <sup>a</sup> |    |    |     |      |      |                  |                | Title <sup>d</sup>                                                                                              |
|------|----------------------------------------------------------|----|----|-----|------|------|------------------|----------------|-------------------------------------------------------------|----|----|-----|------|------|------------------|----------------|-----------------------------------------------------------------------------------------------------------------|
|      | TP <sup>b</sup>                                          | FP | TN | FN  | Spec | Sens | CCR <sup>c</sup> | L <sup>c</sup> | TP <sup>b</sup>                                             | FP | TN | FN  | Spec | Sens | CCR <sup>c</sup> | L <sup>c</sup> |                                                                                                                 |
| 121  | 11                                                       | 2  | 20 | 52  | 0.91 | 0.17 | 0.54             | 1.28           | 11                                                          | 2  | 15 | 46  | 0.88 | 0.19 | 0.54             | 1.09           | NCI human tumor cell line growth inhibition assay. Data for the K-562 Leukemia cell line                        |
| 123  | 11                                                       | 2  | 20 | 52  | 0.91 | 0.17 | 0.54             | 1.28           | 11                                                          | 2  | 15 | 46  | 0.88 | 0.19 | 0.54             | 1.09           | NCI human tumor cell line growth inhibition assay. Data for the MOLT-4 Leukemia cell line                       |
| 248  | 21                                                       | 6  | 54 | 66  | 0.90 | 0.24 | 0.57             | 2.07           | 13                                                          | 2  | 33 | 56  | 0.94 | 0.19 | 0.57             | 2.20           | NCI In Vivo Anticancer Drug Screen. Data for tumor model L1210 Leukemia (intraperitoneal) in B6D2F1 (BDF1) mice |
| 256  | 22                                                       | 5  | 25 | 34  | 0.83 | 0.39 | 0.61             | 1.96           | 12                                                          | 2  | 11 | 32  | 0.85 | 0.27 | 0.56             | 1.18           | NCI In Vivo Anticancer Drug Screen. Data for tumor model L1210 Leukemia (intraperitoneal) in CD2F1 (CDF1) mice  |
| 328  | 23                                                       | 3  | 12 | 14  | 0.80 | 0.62 | 0.71             | 2.33           | 15                                                          | 2  | 10 | 19  | 0.83 | 0.44 | 0.64             | 1.76           | NCI In Vivo Anticancer Drug Screen. Data for tumor model P388 Leukemia (intraperitoneal) in B6D2F1 (BDF1) mice  |
| 330  | 27                                                       | 5  | 33 | 45  | 0.87 | 0.38 | 0.62             | 2.38           | 15                                                          | 4  | 20 | 43  | 0.83 | 0.26 | 0.55             | 1.24           | NCI In Vivo Anticancer Drug Screen. Data for tumor model P388 Leukemia (intraperitoneal) in CD2F1 (CDF1) mice   |
| 589  | 23                                                       | 12 | 70 | 117 | 0.85 | 0.16 | 0.51             | 1.04           | 27                                                          | 5  | 35 | 131 | 0.88 | 0.17 | 0.52             | 1.14           | qHTS Assay for Spectroscopic Profiling in 4-MU Spectral Region                                                  |
| 590  | 22                                                       | 12 | 68 | 112 | 0.85 | 0.16 | 0.51             | 1.01           | 27                                                          | 4  | 35 | 124 | 0.90 | 0.18 | 0.54             | 1.39           | qHTS Assay for Spectroscopic Profiling in A350 Spectral Region                                                  |
| 1189 | 28                                                       | 8  | 17 | 31  | 0.68 | 0.47 | 0.58             | 1.32           | 48                                                          | 10 | 16 | 44  | 0.62 | 0.52 | 0.57             | 1.23           | DSSTox (CPDBAS) Carcinogenic Potency Database Summary SingleCellCall Results                                    |
| 1199 | 19                                                       | 4  | 12 | 27  | 0.75 | 0.41 | 0.58             | 1.32           | 36                                                          | 8  | 10 | 35  | 0.56 | 0.51 | 0.53             | 1.01           | DSSTox (CPDBAS) Carcinogenic Potency Database Summary Mouse Bioassay Results                                    |
| 1205 | 21                                                       | 4  | 14 | 26  | 0.78 | 0.45 | 0.61             | 1.61           | 39                                                          | 9  | 11 | 34  | 0.55 | 0.53 | 0.54             | 1.07           | DSSTox (CPDBAS) Carcinogenic Potency Database Summary MultiCellCall Results                                     |
| 1996 | 70                                                       | 28 | 3  | 3   | 0.10 | 0.96 | 0.53             | 1.03           | 70                                                          | 17 | 5  | 7   | 0.23 | 0.91 | 0.57             | 1.11           | Aqueous Solubility from MLSMR Stock Solutions                                                                   |

|                     |    |    |     |     |      |      |      |      |    |    |     |     |      |      |      |      |                                                                                                                                                                 |
|---------------------|----|----|-----|-----|------|------|------|------|----|----|-----|-----|------|------|------|------|-----------------------------------------------------------------------------------------------------------------------------------------------------------------|
| 2330                | 11 | 6  | 111 | 152 | 0.95 | 0.07 | 0.51 | 1.13 | 21 | 5  | 48  | 147 | 0.91 | 0.13 | 0.52 | 1.10 | Luminescence Cell-Based Primary HTS to Identify Inhibitors of STK33                                                                                             |
| 686978 <sup>e</sup> | 74 | 46 | 139 | 200 | 0.75 | 0.27 | 0.51 | 1.06 | 99 | 31 | 80  | 218 | 0.72 | 0.31 | 0.52 | 1.08 | qHTS for Inhibitors of human tyrosyl-DNA phosphodiesterase 1 (TDP1): qHTS in cells in absence of CPT                                                            |
| 686979              | 67 | 31 | 144 | 201 | 0.82 | 0.25 | 0.54 | 1.37 | 86 | 29 | 85  | 220 | 0.75 | 0.28 | 0.51 | 1.07 | qHTS for Inhibitors of human tyrosyl-DNA phosphodiesterase 1 (TDP1): qHTS in cells in presence of CPT                                                           |
| 720532              | 39 | 25 | 159 | 236 | 0.86 | 0.14 | 0.50 | 1.00 | 40 | 10 | 102 | 273 | 0.91 | 0.13 | 0.52 | 1.30 | qHTS for Inhibitors of binding or entry into cells for Marburg Virus                                                                                            |
| 743065              | 61 | 44 | 122 | 163 | 0.73 | 0.27 | 0.50 | 1.00 | 96 | 27 | 79  | 203 | 0.75 | 0.32 | 0.53 | 1.22 | qHTS assay to identify small molecule antagonists of the thyroid receptor (TR) signaling pathway                                                                |
| 743067 <sup>e</sup> | 18 | 10 | 117 | 162 | 0.92 | 0.10 | 0.51 | 1.15 | 29 | 8  | 76  | 197 | 0.90 | 0.13 | 0.52 | 1.20 | qHTS assay to identify small molecule antagonists of the thyroid receptor (TR) signaling pathway: Summary <sup>e</sup>                                          |
| 743140 <sup>e</sup> | 18 | 3  | 147 | 196 | 0.98 | 0.08 | 0.53 | 3.15 | 17 | 3  | 94  | 256 | 0.97 | 0.06 | 0.52 | 1.51 | qHTS assay to identify small molecule agonists of the peroxisome proliferator-activated receptor gamma (PPAR $\gamma$ ) signaling pathway: Summary <sup>e</sup> |
| 743202 <sup>e</sup> | 20 | 10 | 88  | 142 | 0.90 | 0.12 | 0.51 | 1.10 | 26 | 5  | 56  | 174 | 0.92 | 0.13 | 0.52 | 1.32 | qHTS assay for small molecule agonists of the antioxidant response element (ARE) signaling pathway <sup>e</sup>                                                 |

Abbreviations: TP, true positive; TN, true negative; FP, false positive; FN, false negative; Sens, sensitivity; Spec, specificity; CCR, correct classification rate; L, likelihood parameter.

The first three criteria used to in the automated selection process were that the assay had to <sup>a</sup>appear in both profile groups, <sup>b</sup>contain > 10 active responses that matched the inputted data, and <sup>c</sup>correlation was better than random (CCR > 0.5 and L  $\geq$  1). <sup>d</sup>Manual evaluation was required to determine if it was an *in vitro* assay and relevant to liver toxicity or oxidative stress. <sup>e</sup>AIDs 686978, 743067, and 743140, 743202 sufficed the criteria described.

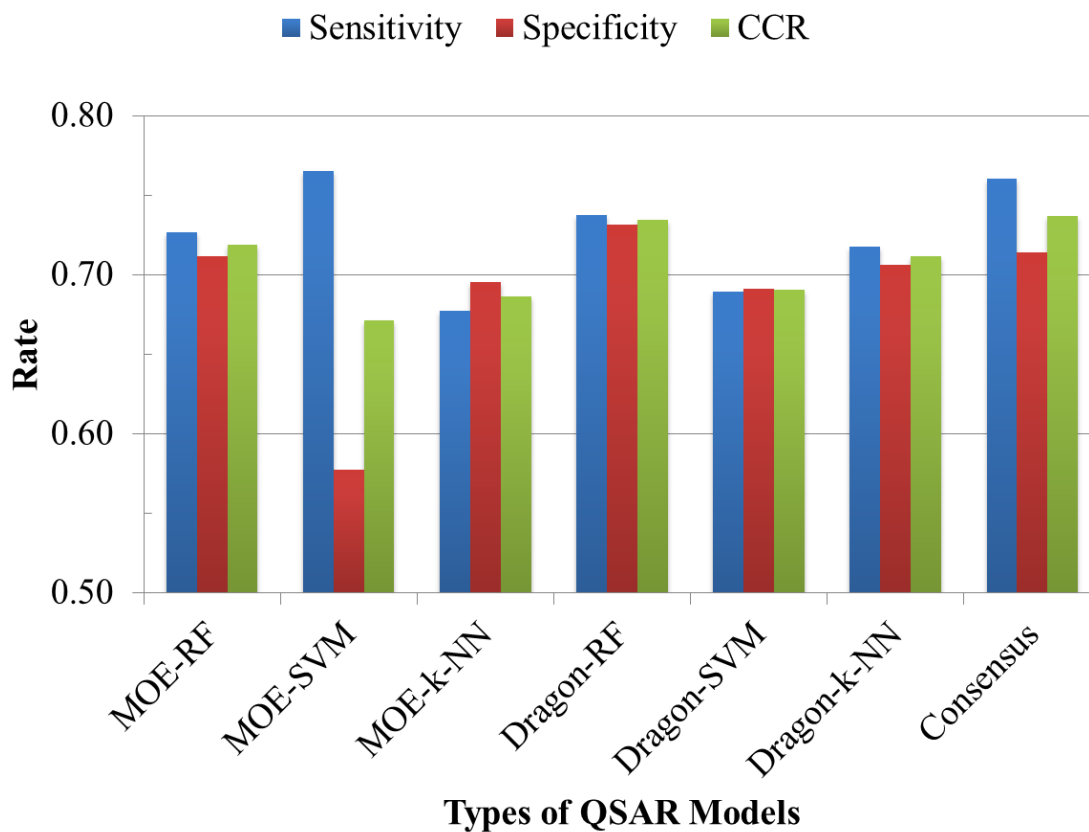

**Figure S1.** Performance of all individual models and the consensus model in the 5-fold cross validation
